# Supplementary material
Source: Springer Nature journal article supplement (https://www.springermedizin.de/resource/supplementary/12987_2007_288_MOESM6_ESM.pdf/9611726)

Ventricle  
size

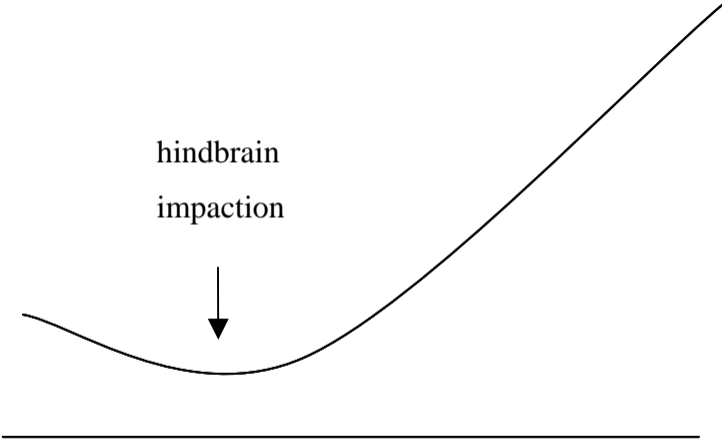

hindbrain  
impaction

Intracranial pressure

Supplement: MOESM6 [file 9611726]
